# Supplementary material for: SnSe2 monolayer with square lattice structure: a promising p-type thermoelectric material with an indirect bandgap and low lattice thermal conductivity
Source: Royal Society of Chemistry journal article supplement (doi:10.1039/d2tc03587a), 2022-01-01
Supplement: d2tc03587a1.pdf [file d2tc03587a1.pdf]

## **Supplementary Information**

for

### **SnSe<sub>2</sub> monolayer with square lattice structure: A promising *p*-type thermoelectric material with indirect bandgap and low lattice thermal conductivity**

Shuwei Tang<sup>\*,a,b</sup> Mengxiu Wu,<sup>a</sup> Shulin Bai,<sup>a</sup> Dongming Luo,<sup>a</sup> Jingyi Zhang,<sup>a</sup> Da Wan,<sup>a</sup>  
Xiaodong Li<sup>a</sup>

<sup>a</sup>College of Materials Science and Engineering, Liaoning Technical University, Fuxin,  
Liaoning 123000, China.

<sup>b</sup>Faculty of Chemistry, Northeast Normal University, Changchun, Jilin 130024, China.

Corresponding author:

Shuwei Tang

E-mail: tangsw911@nenu.edu.cn

College of Materials Science & Engineering  
Liaoning Technical University  
Zhonghua Road. #47  
Fuxin, Liaoning  
123000, China  
Tel/Fax: +86-418-5110098

## Contents

1. Figure S1. The snapshots of AIMD simulations of the SnSe<sub>2</sub> monolayer at 300K and 900K .....Page S3
2. Figure S2. The anharmonic scattering rates, isotopic scattering rates and boundary scattering rates of the SnSe<sub>2</sub> monolayer.....Page S4
3. Figure S3. The Phase spaces for absorption and emission processes.....Page S5
4. Table S1. The carrier mobility and relaxation time for electrons and holes of SnSe<sub>2</sub> monolayer at 300, 500, 700 and 900K.....Page S6

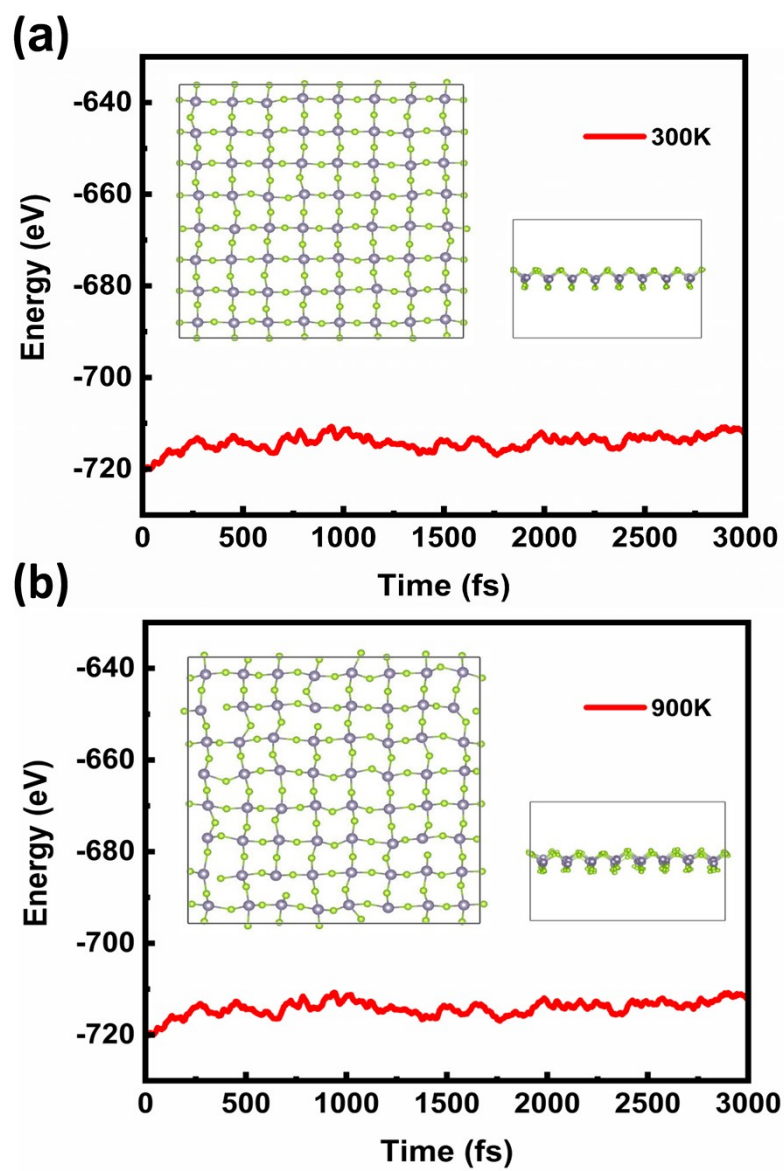

Figure. S1. The snapshots of AIMD simulations of the SnSe<sub>2</sub> monolayer at (a) 300K and (b) 900K. The black and green balls represent the Sn and Se atoms, respectively.

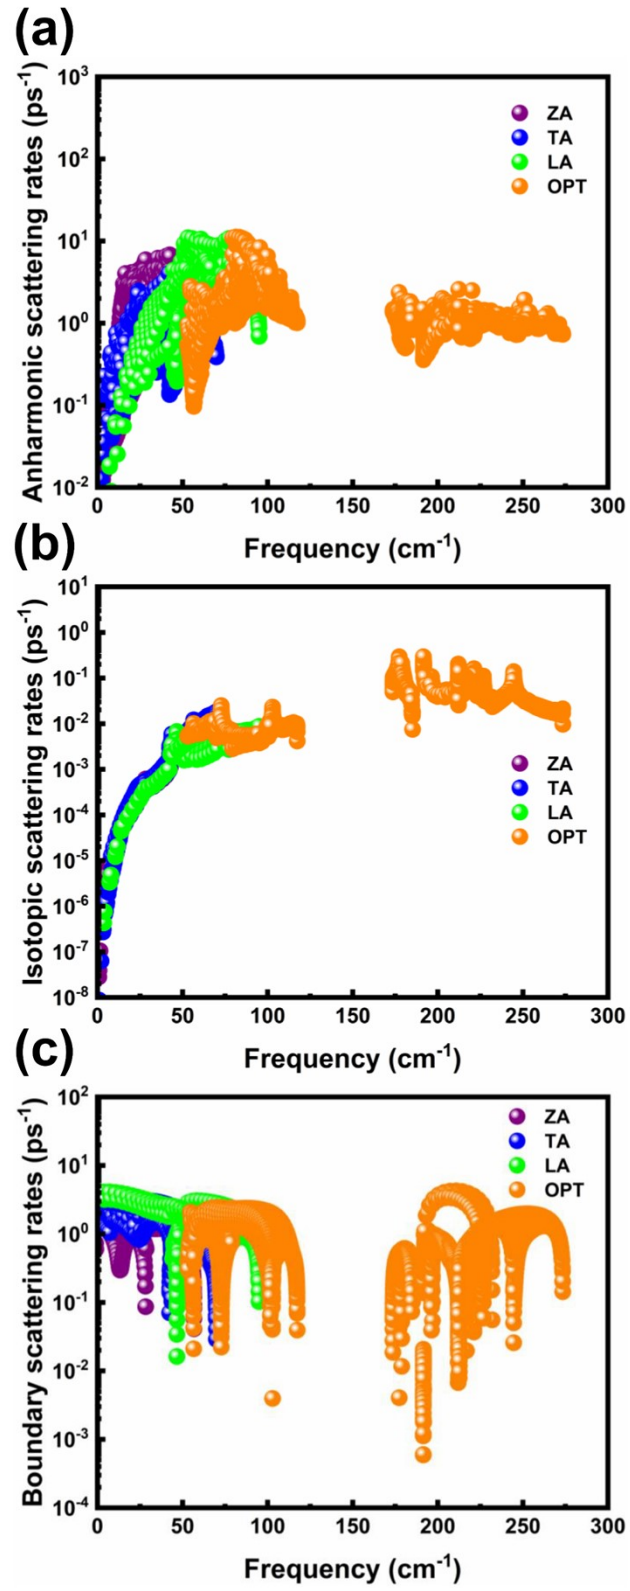

Figure.S2. (a) Anharmonic scattering rates, (b) Isotopic scattering rates, and (c) Boundary scattering rates of SnSe<sub>2</sub> monolayer.

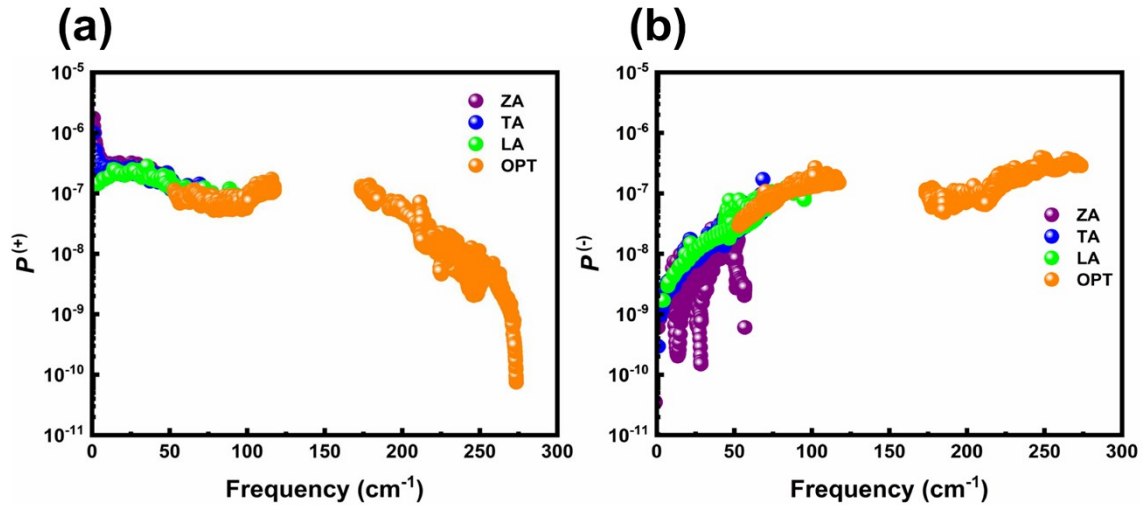

Figure S3. Phase spaces for (a) absorption and (b) emission processes of SnSe<sub>2</sub> monolayer.

Table S1. The carrier mobility ( $\mu$ ,  $\text{cm}^2\text{V}^{-1}\text{s}^{-1}$ ) and relaxation time ( $\tau$ , ps) for electrons and holes of  $\text{SnSe}_2$  monolayer at 300, 500, 700 and 900K.

| Temperature | Carriers | $\mu_{2D}$ ( $\text{cm}^2/\text{V}\cdot\text{s}$ ) | $\tau$ (ps) |
|-------------|----------|----------------------------------------------------|-------------|
| 300K        | hole     | 71.28                                              | 0.063       |
|             | electron | 115.39                                             | 0.053       |
| 500K        | hole     | 42.77                                              | 0.038       |
|             | electron | 69.24                                              | 0.032       |
| 700K        | hole     | 30.55                                              | 0.027       |
|             | electron | 49.45                                              | 0.023       |
| 900K        | hole     | 23.76                                              | 0.021       |
|             | electron | 38.46                                              | 0.018       |
